# Supplementary material for: Simultaneous voltammetric sensing of Zn2+, Cd2+, and Pb2+using an electrodeposited Bi–Sb nanocomposite modified carbon paste electrode
Source: Royal Society of Chemistry journal article supplement (doi:10.1039/d3ra00168g), 2023-01-01
Supplement: d3ra00168g1.pdf [file d3ra00168g1.pdf]

**The supplementary information document for the paper entitled:**

Simultaneous voltametric sensing of  $\text{Zn}^{2+}$ ,  $\text{Cd}^{2+}$ , and  $\text{Pb}^{2+}$  using an electrodeposited Bi–Sb nanocomposite modified carbon paste electrode

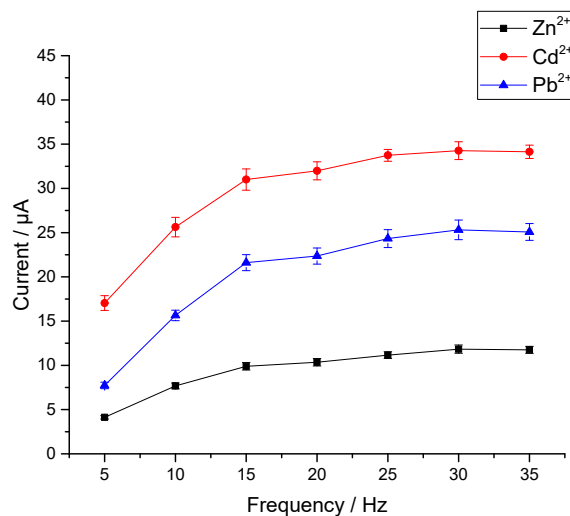

(a)

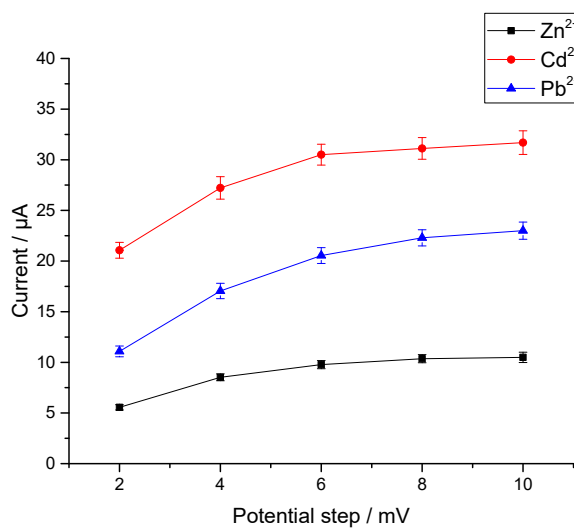

(b)

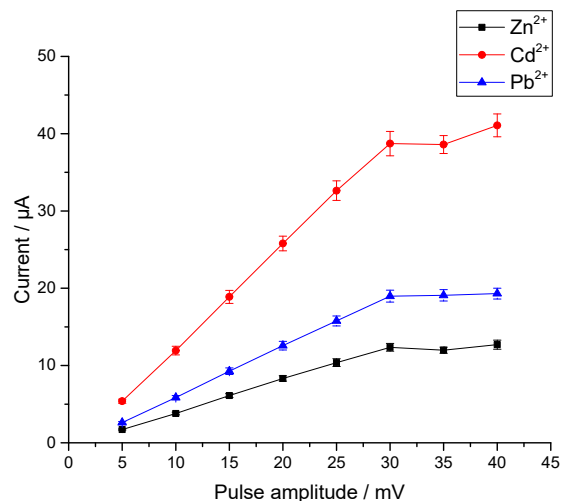

(c)

**Fig. S1. Effect of (a) frequency, (b) potential step, and (c) pulse amplitude on the stripping peak currents for  $100 \mu\text{g L}^{-1}$   $\text{Zn}^{2+}$ ,  $\text{Cd}^{2+}$ , and  $\text{Pb}^{2+}$  in ABS (pH 5.6) at the Bi-Sb/CPE.**

#### Sensitivity, LOD and LOQ calculation

The limit of detection (LOD) and the limit of quantification (LOQ) were calculated by the following equations:

$$\text{LOD} = 3 \text{ SD/S}$$

$$\text{LOQ} = 10 \text{ SD/S}$$

where (SD) is the standard deviation of the intercept of the calibration curve equation (3 replicates) and (S) is the sensitivity of the method (equal to the slope of calibration curve).

**Table S2. Precision and accuracy of the described SW-ASV method for simultaneous determination of  $\text{Zn}^{2+}$ ,  $\text{Cd}^{2+}$ , and  $\text{Pb}^{2+}$**

| Metal ions | Spiked<br>( $\mu\text{g L}^{-1}$ ) | Found<br>( $\mu\text{g L}^{-1}$ ) | % recovery | RSD<br>(n=5) |
|------------|------------------------------------|-----------------------------------|------------|--------------|
| Zn         | 15                                 | 14.75                             | 98.3       | 2.35         |
|            | 75                                 | 74.63                             | 99.5       | 2.94         |

|    |     |        |       |      |
|----|-----|--------|-------|------|
|    | 150 | 148.05 | 98.7  | 4.13 |
|    | 15  | 15.06  | 100.4 | 1.54 |
| Cd | 75  | 74.48  | 99.31 | 3.27 |
|    | 150 | 151.8  | 101.2 | 3.63 |
|    | 15  | 14.73  | 98.2  | 2.62 |
| Pb | 75  | 73.8   | 98.4  | 3.44 |
|    | 150 | 150.6  | 100.4 | 2.89 |
